# Supplementary material for: Negligible contribution of M2634V substitution to ZIKV pathogenesis in AG6 mice revealed by a bacterial promoter activity reduced infectious clone
Source: PubMed Central journal article supplement (PMC6043478; doi:10.1038/s41598-018-28890-0), 2018-07-12

**Negligible contribution of M2634V substitution to ZIKV pathogenesis in AG6 mice revealed by a bacterial promoter activity reduced infectious clone**

Fanfan Zhao,<sup>1</sup> Yongfen Xu,<sup>1</sup> Dimitri Lavillette,<sup>1</sup> Jin Zhong,<sup>1</sup>

Gang Zou<sup>1</sup> and Gang Long<sup>1,\*</sup>

<sup>1</sup>Key Laboratory of Molecular Virology and Immunology, Institut Pasteur of Shanghai, Chinese Academy of Sciences, Shanghai, China.

\*Corresponding author. Mailing address: Life Science Research Building, 320 Yueyang Road, Shanghai 200031, P.R. China. Phone: +86-21-54923161. Fax: +86-21-54923161. E-mail: [glong@ips.ac.cn](mailto:glong@ips.ac.cn)

Figure 2G

Capsid

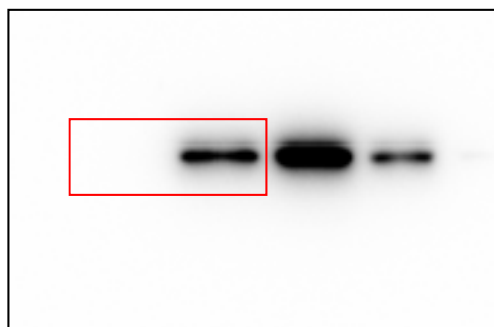

E

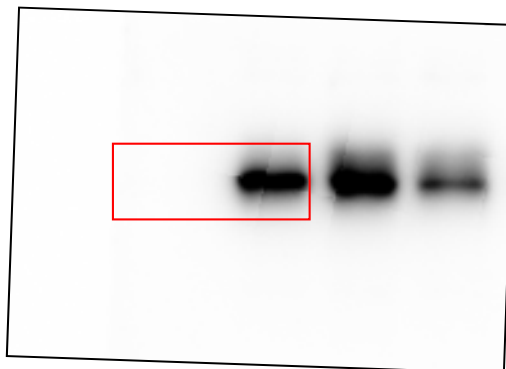

NS1

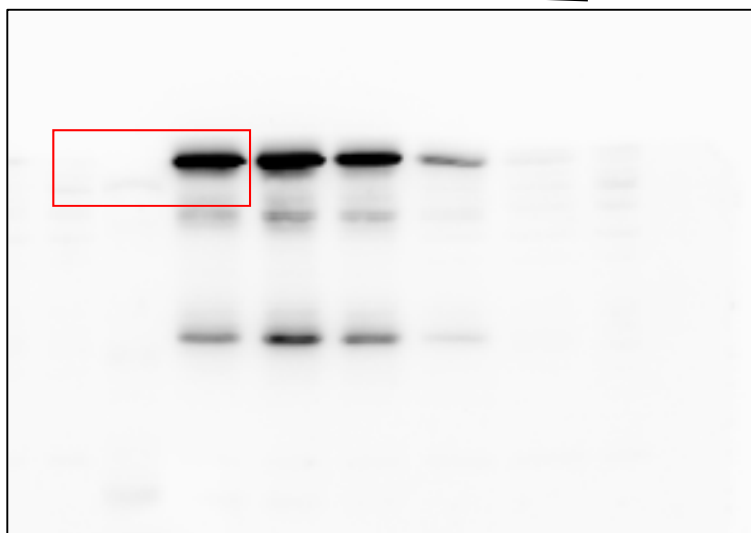

NS3

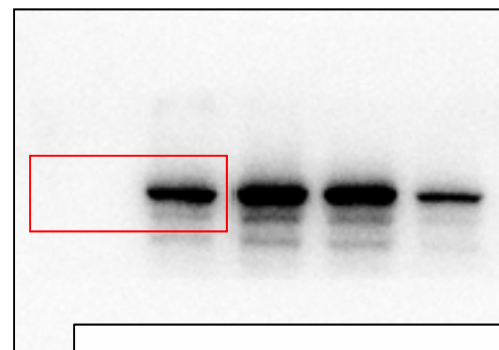

NS5

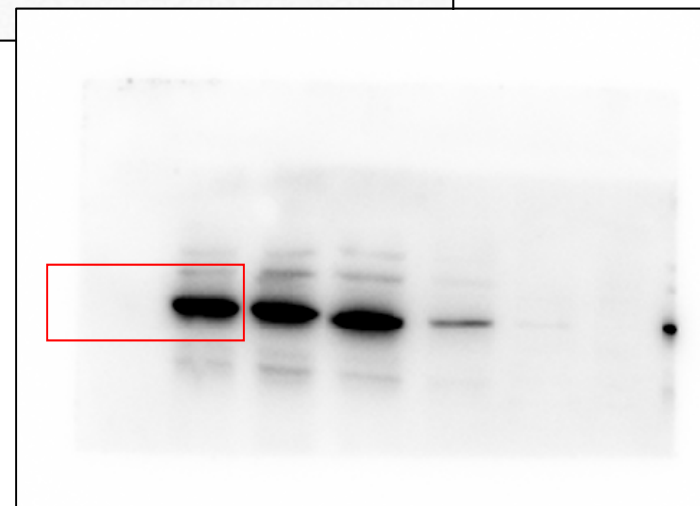

Tubulin

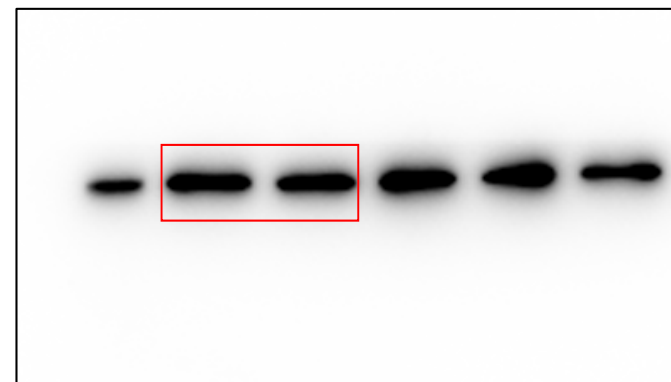

Figure 5D

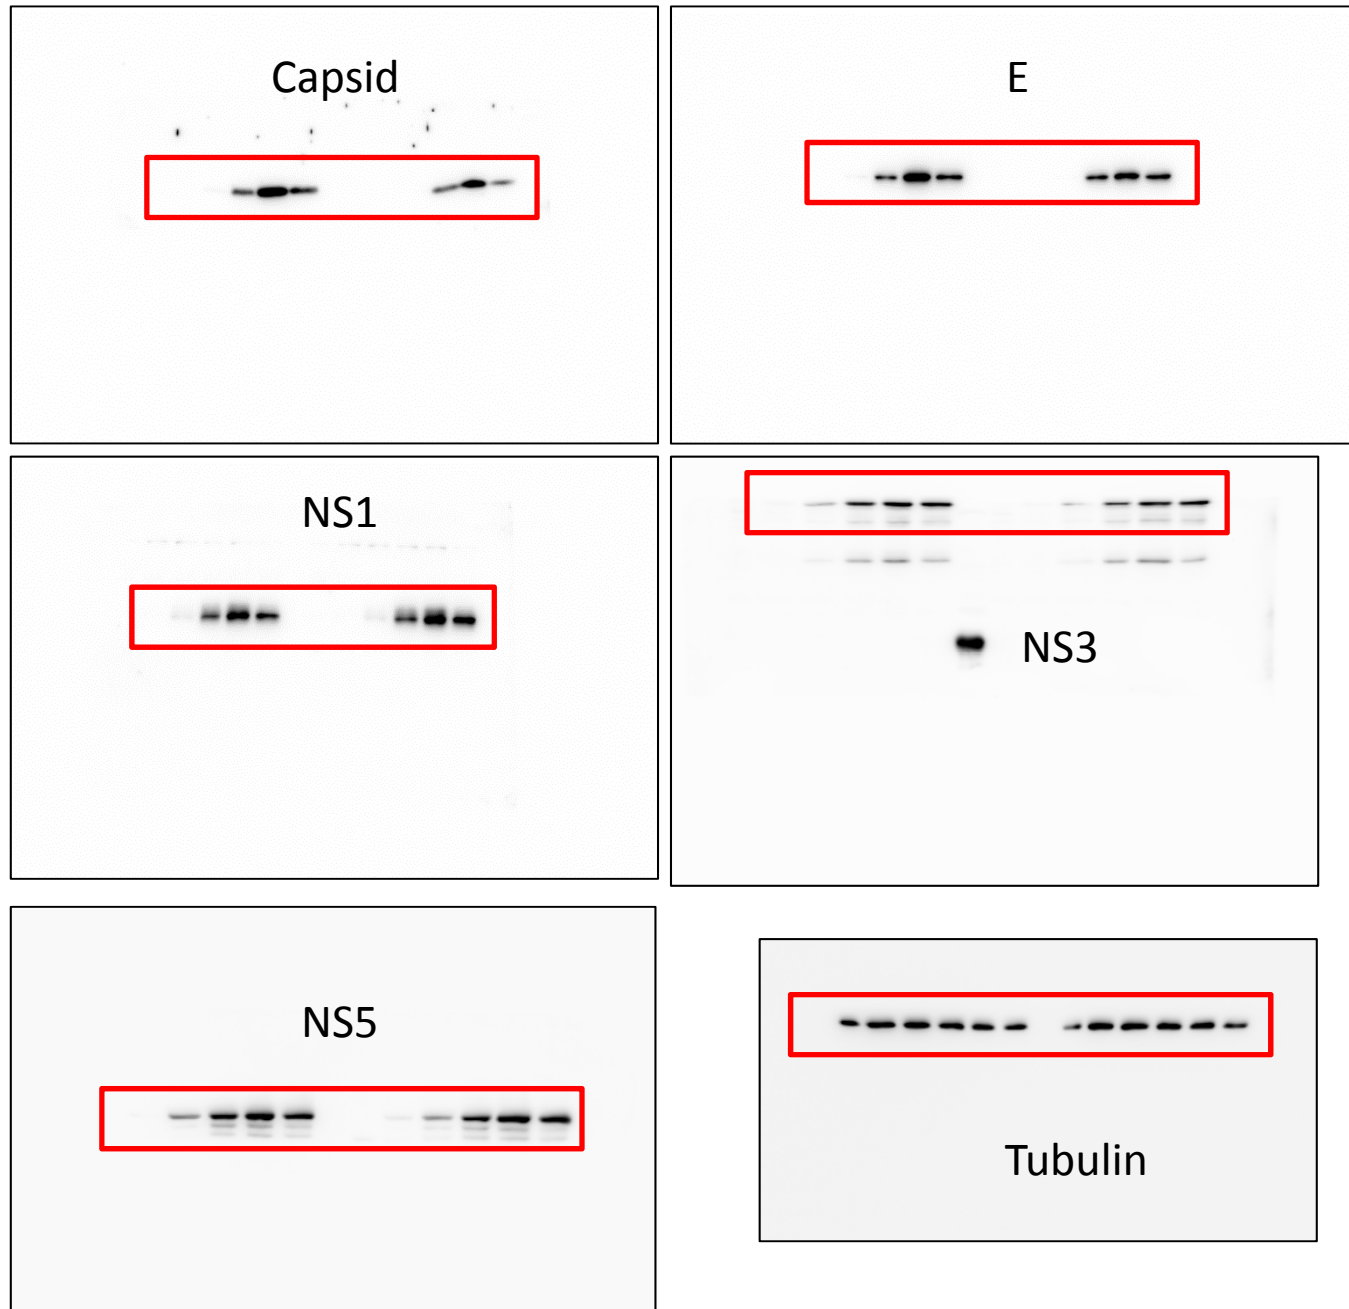

Figure 6C

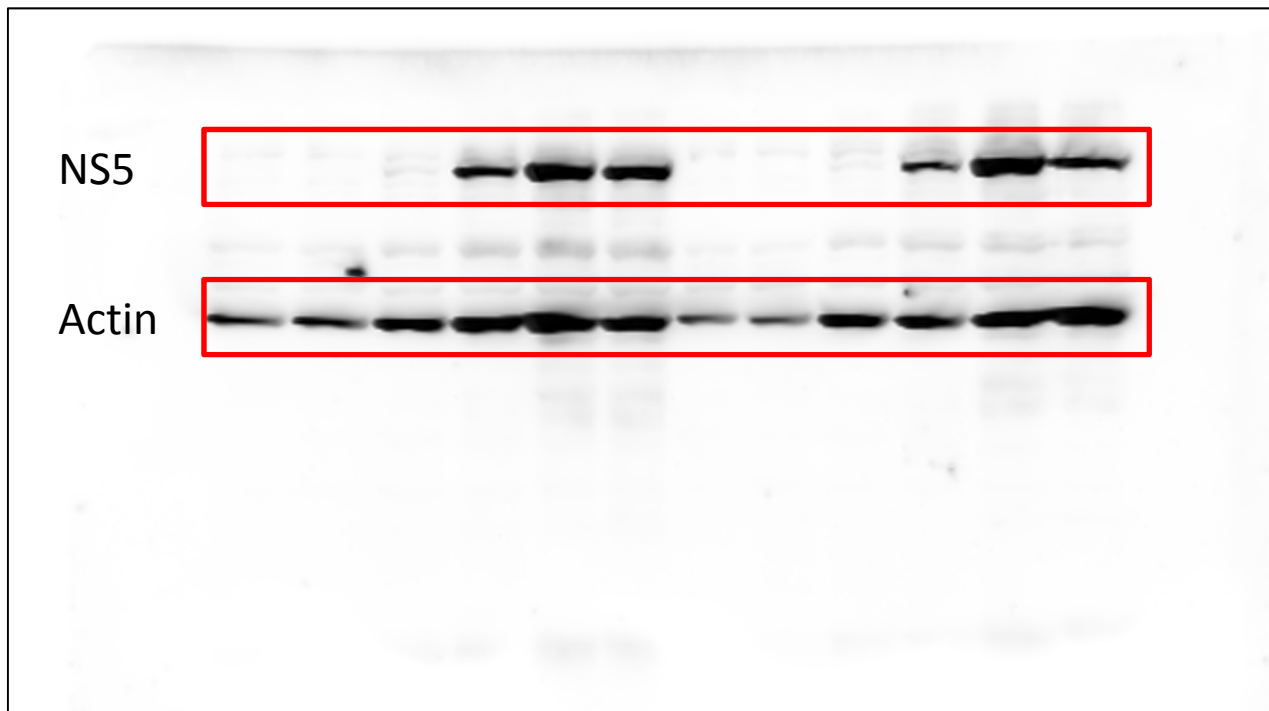

Figure 6F

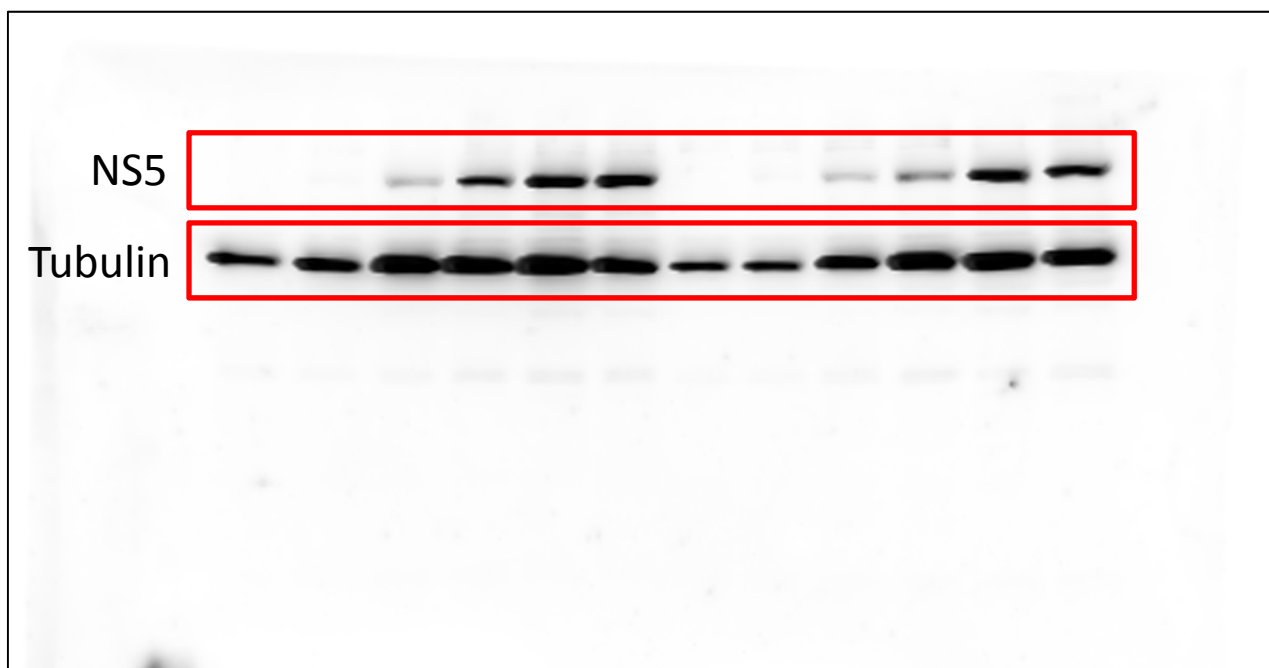

Figure 8 C

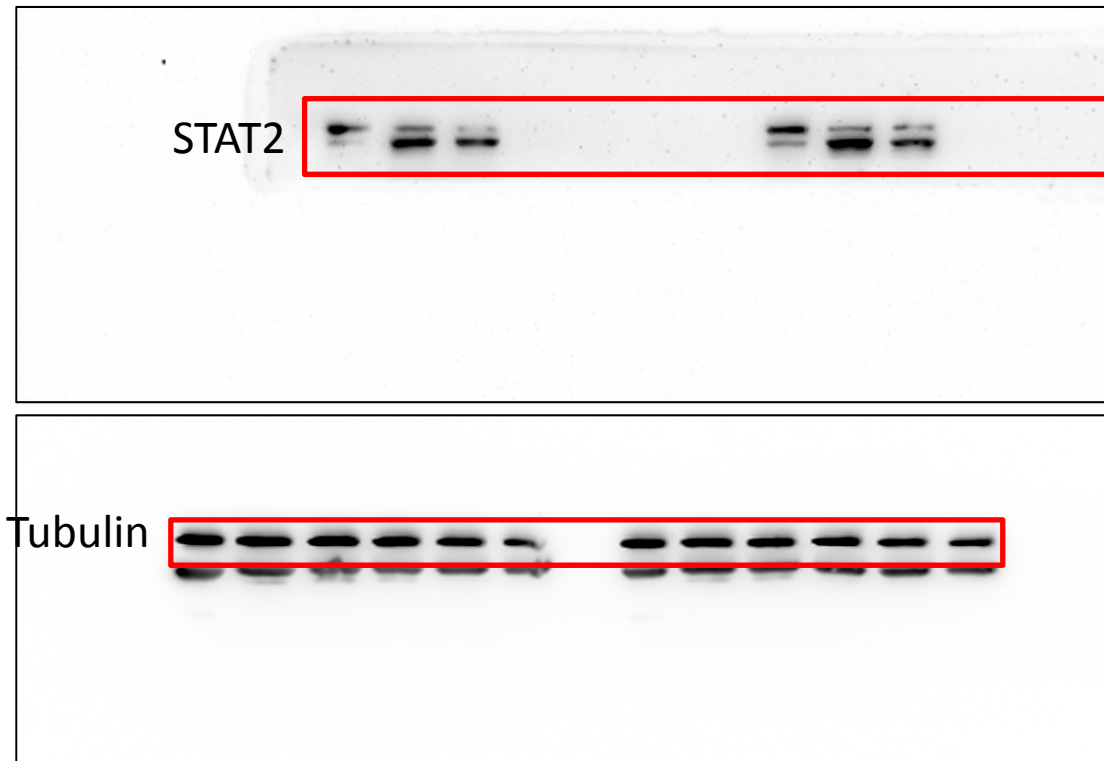

Supplement: 41598_2018_28890_MOESM1_ESM.pdf [file 41598_2018_28890_MOESM1_ESM.pdf]
